# Supplementary material
Source: ML conference proceedings conference paper supplement (https://openaccess.thecvf.com/content/ICCV2025/html/Zhang_Egocentric_Action-aware_Inertial_ICCV_2025_paper.html)
Supplement: Supplementary file 1 [file supp.pdf › 05049_supp/supp.pdf]

# Egocentric Action-aware Inertial Localization in Point Clouds with Vision-Language Guidance

## Supplementary Material

### 9. Supplementary Ablation Studies

**Different Vision-Language Encoder in Stage 1** We compare CLIP-Large[50], InternVL[7], and SLIP-Base[43] as possible backbones for the vision-language encoders. While InternVL scores the highest on some metrics, SLIP generally attains stronger localization accuracy. Hence, in our default configuration, we adopt SLIP as the vision-language encoder.

#### Temporal Length of Input IMU Sequence in Stage 2

We experiment with sequences of 5s, 10s, and 20s of IMU data. Shorter 5s windows excel on the seen rooms but underperform on the unseen set. Longer 20s windows better preserve temporal context and yield a slight gain in unseen action top-1 performance, yet they degrade localization in both settings. By contrast, 10s serves as a balanced choice, delivering robust localization and action recognition across seen/unseen scenarios.

#### Residual Connection in Stage 2 Architecture Design

Removing residual connections, either on the IMU feature path or on the point cloud feature path, consistently de-

grades results. In contrast, preserving both forms of residual connections significantly improves localization and action accuracy. This highlights the importance of allowing the network to fuse new spatiotemporal cues while maintaining a direct pathway for unimodal features.

#### Preliminary Location Retrieval Accuracy in Stage 1

Lastly, we assess how well the short-term feature alignment from Stage 1 alone can recover the user’s location. Doing so attains considerably lower accuracy compared to our full Stage 2 inference. This underscores the utility of leveraging both temporal context and global spatial reasoning to refine the initial retrieval from Stage 1.

### 10. Supplementary Video

We create a supplementary video that further illustrates the performance of our framework. The heatmaps featured in the video are interpreted similarly to those shown in Fig. 5, providing visual insight into the localization process. The video demonstrates the robustness of our approach, highlighting its capability for accurate long-term human tracking across extended periods.

Table 5. Supplementary Ablation Studies.

| Method                                                    | Seen Rooms   |              |              |              |                     |                     | Unseen Rooms |              |              |              |                     |                     |
|-----------------------------------------------------------|--------------|--------------|--------------|--------------|---------------------|---------------------|--------------|--------------|--------------|--------------|---------------------|---------------------|
|                                                           | 0.2m         | 0.4m         | 0.6m         | RS           | $\mathcal{A}$ -top1 | $\mathcal{A}$ -top5 | 0.2m         | 0.4m         | 0.6m         | RS           | $\mathcal{A}$ -top1 | $\mathcal{A}$ -top5 |
| <i>Different Vision-Language Encoder in Stage 1</i>       |              |              |              |              |                     |                     |              |              |              |              |                     |                     |
| CLIP                                                      | 42.72        | 69.33        | 89.63        | 95.94        | 20.81               | 52.05               | 21.60        | 53.45        | 83.41        | 86.44        | 12.68               | 40.38               |
| InternVL                                                  | 42.41        | 69.21        | <b>90.95</b> | <b>96.15</b> | 17.15               | 50.80               | 26.11        | 60.46        | 87.70        | <b>90.18</b> | 9.84                | 39.44               |
| SLIP                                                      | <b>43.86</b> | <b>70.15</b> | 89.6         | 96.01        | <b>21.48</b>        | <b>53.62</b>        | <b>26.86</b> | <b>65.97</b> | <b>90.79</b> | 89.55        | <b>15.03</b>        | <b>43.34</b>        |
| <i>Temporal Length of Input IMU Sequence in Stage 2</i>   |              |              |              |              |                     |                     |              |              |              |              |                     |                     |
| 5s                                                        | <b>45.27</b> | <b>71.86</b> | <b>90.84</b> | <b>96.18</b> | 21.23               | 53.57               | 25.69        | 64.07        | 87.11        | 89.28        | 14.53               | 43.62               |
| 20s                                                       | 43.10        | 69.61        | 89.11        | 95.84        | 20.82               | 52.53               | 24.77        | 61.09        | 85.99        | 89.15        | <b>15.41</b>        | <b>44.77</b>        |
| 10s                                                       | 43.86        | 70.15        | 89.6         | 96.01        | <b>21.48</b>        | <b>53.62</b>        | <b>26.86</b> | <b>65.97</b> | <b>90.79</b> | <b>89.55</b> | 15.03               | 43.34               |
| <i>Residual Connection in Stage 2 Architecture Design</i> |              |              |              |              |                     |                     |              |              |              |              |                     |                     |
| w/o IMU residual                                          | 36.29        | 63.56        | 86.84        | 95.05        | 21.45               | 52.38               | 26.07        | 60.41        | 86.03        | 89.10        | 14.90               | 43.15               |
| w/o PC residual                                           | 39.14        | 64.71        | 86.16        | 95.30        | 20.24               | 52.08               | 23.51        | 59.66        | 86.02        | 87.78        | 14.60               | 43.77               |
| w/ both                                                   | <b>43.86</b> | <b>70.15</b> | <b>89.6</b>  | <b>96.01</b> | <b>21.48</b>        | <b>53.62</b>        | <b>26.86</b> | <b>65.97</b> | <b>90.79</b> | <b>89.55</b> | <b>15.03</b>        | <b>43.34</b>        |
| <i>Preliminary Location Retrieval Accuracy in Stage 1</i> |              |              |              |              |                     |                     |              |              |              |              |                     |                     |
| Stage 1 Retrieval                                         | 18.29        | 41.23        | 66.70        | 85.47        | /                   | /                   | 14.25        | 38.51        | 64.31        | 78.31        | /                   | /                   |
| Full 2 Stages                                             | <b>43.86</b> | <b>70.15</b> | <b>89.6</b>  | <b>96.01</b> | <b>21.48</b>        | <b>53.62</b>        | <b>26.86</b> | <b>65.97</b> | <b>90.79</b> | <b>89.55</b> | <b>15.03</b>        | <b>43.34</b>        |
